# Supplementary material for: Transcriptional landscape and clinical utility of enhancer RNAs for eRNA-targeted therapy in cancer
Source: PubMed Central journal article supplement (PMC6783481; doi:10.1038/s41467-019-12543-5), 2019-10-08
Supplement: 41467_2019_12543_MOESM1_ESM.pdf [file 41467_2019_12543_MOESM1_ESM.pdf]

# Supplementary Figure 1

## A

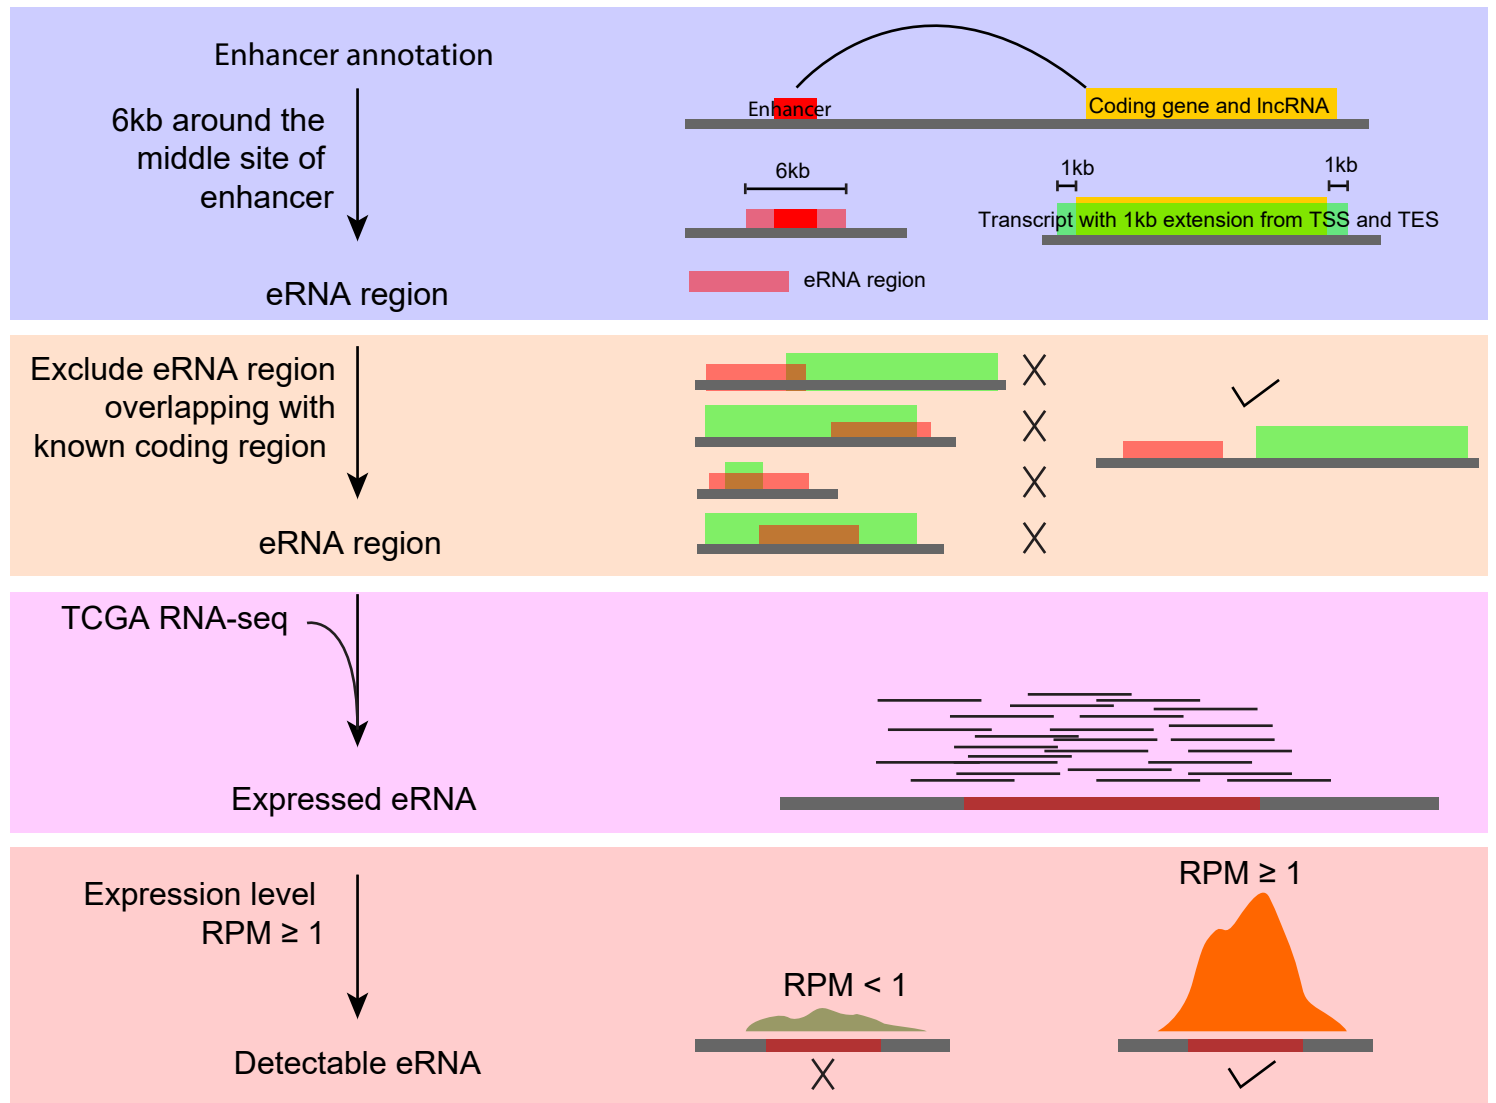

## B

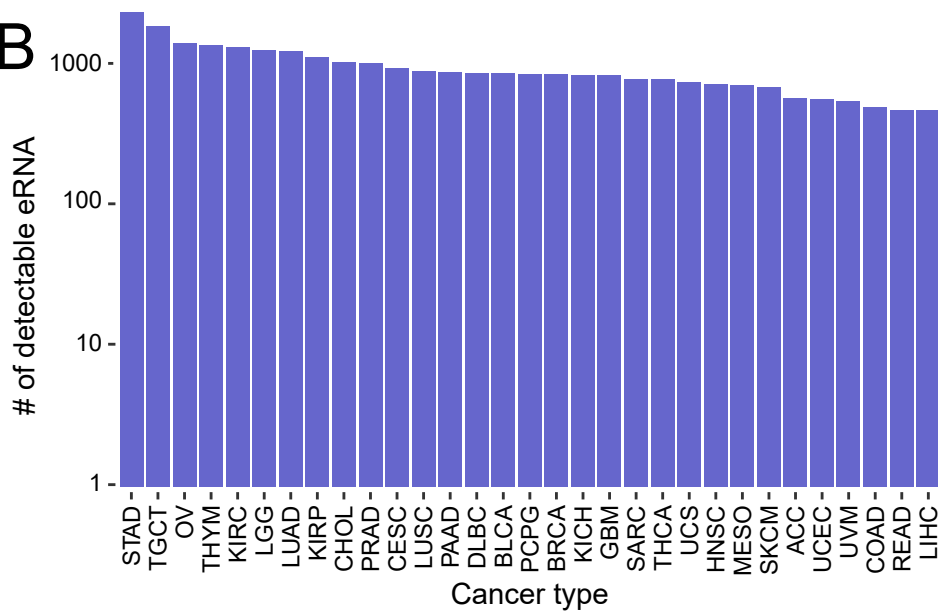

## C

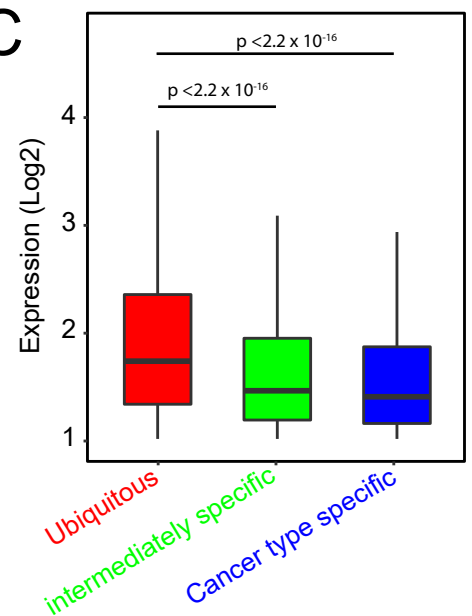

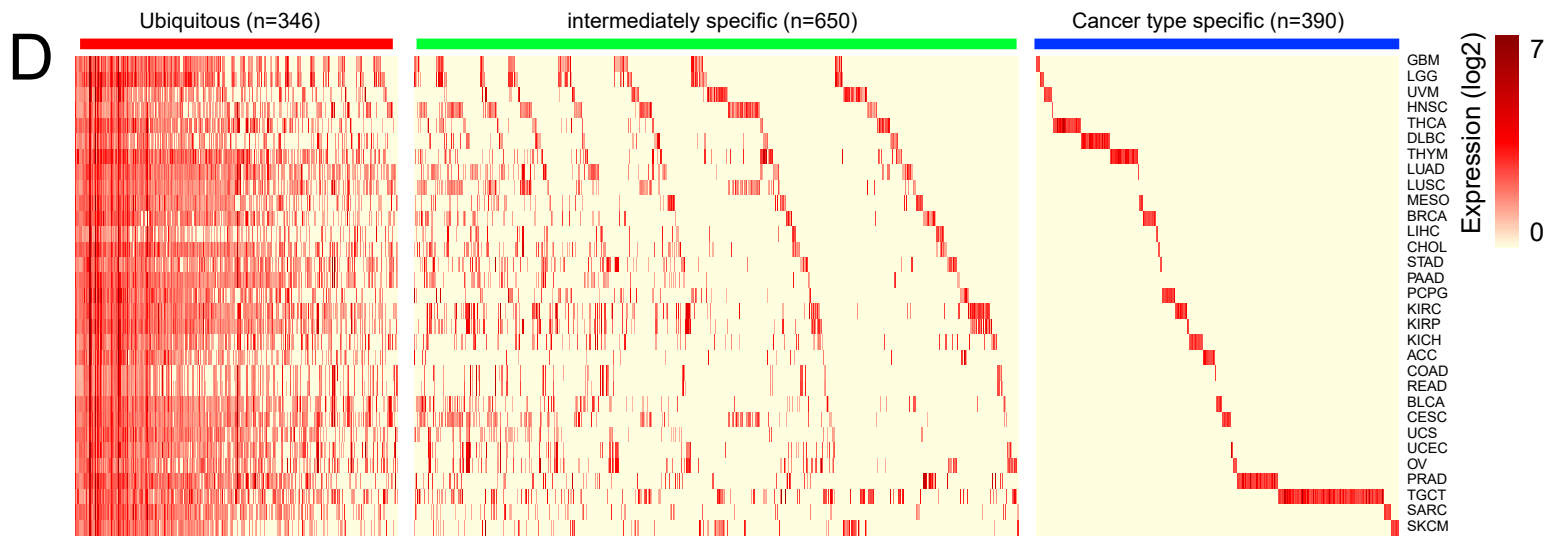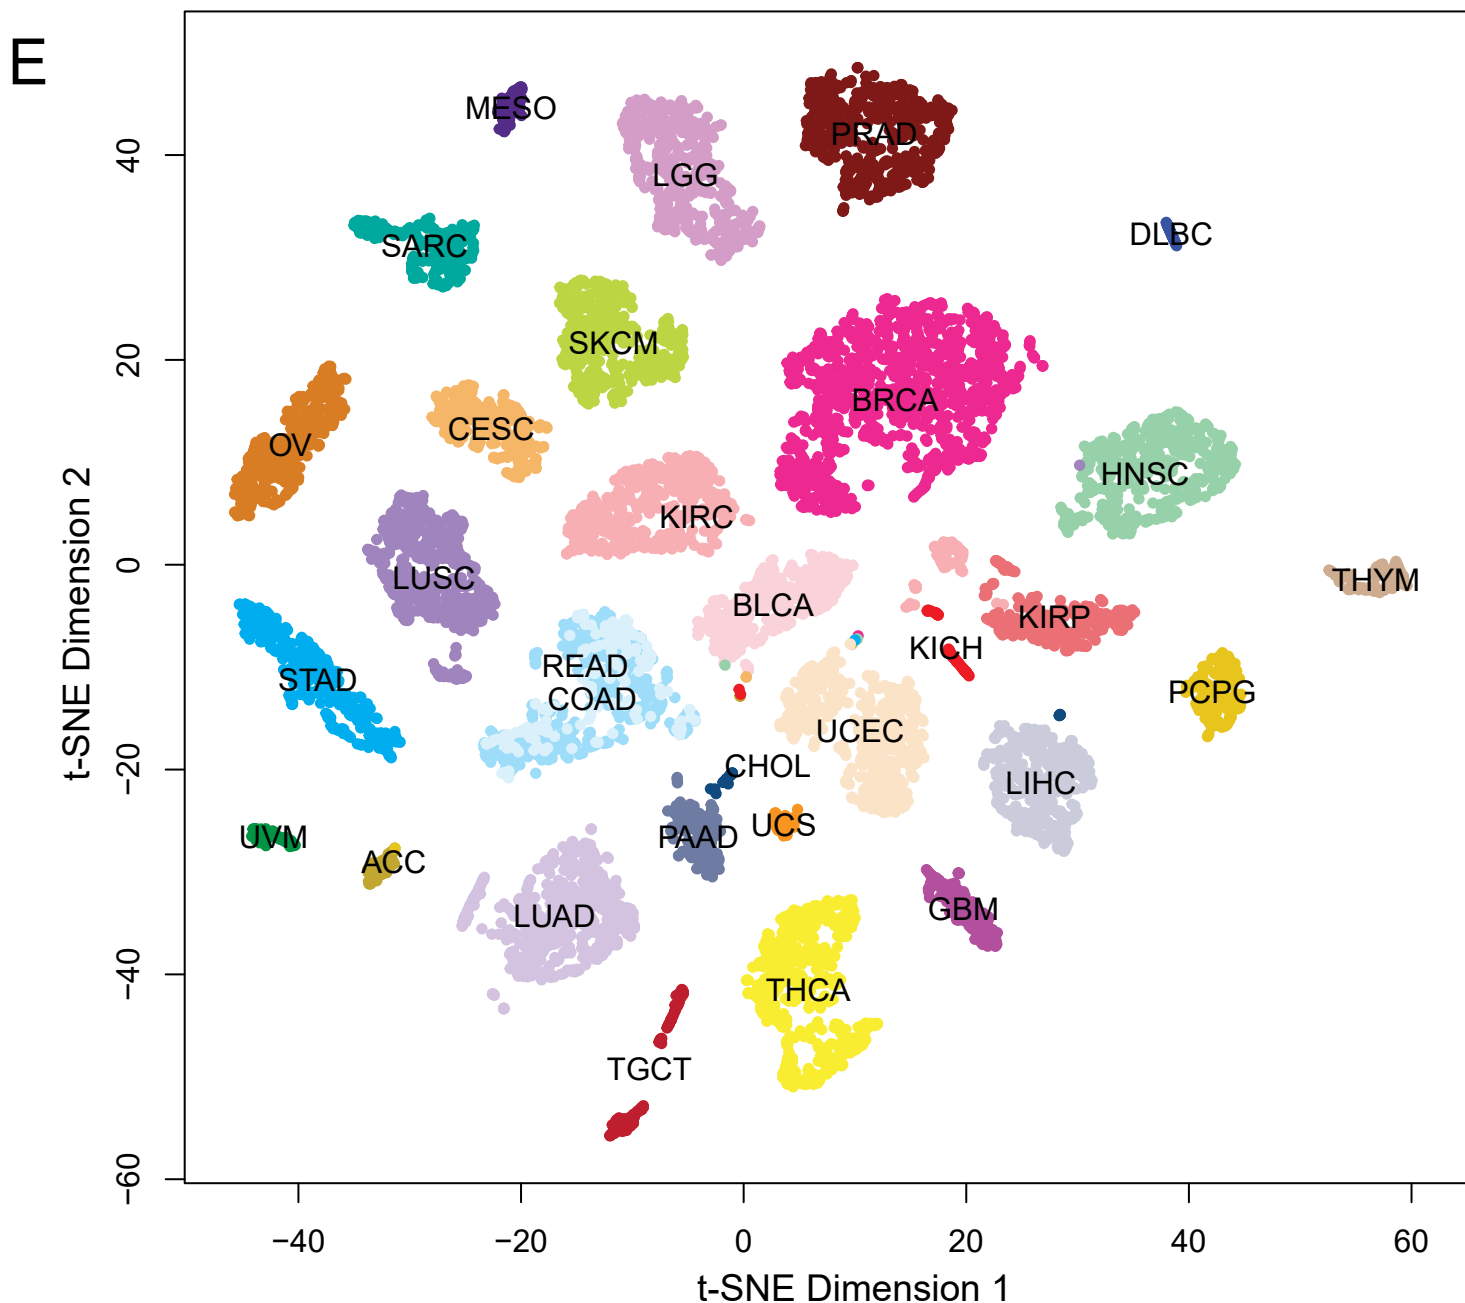

**Supplementary Figure 1. Computational pipeline and features of detectable eRNAs across human cancers.**

(A) Computational pipeline for detecting eRNAs. (B) Number of detectable eRNAs across human cancers. (C) Expression level of ubiquitous eRNAs, intermediately-specific eRNAs, and cancer-type-specific eRNAs. The boxes show the median  $\pm 1$  quartile, with whiskers extending from the hinge to the smallest or largest value within 1.5 interquartile range from the box boundaries. (D) Expression profile of eRNA (average PRM  $\geq 5$ ) in human cancers. Scale bar denotes eRNA expression level. (E) The t-SNE analysis showed cancer-type specific pattern of eRNAs. Dots denote cancer samples and colors denote cancer types.

# Supplementary Figure 2

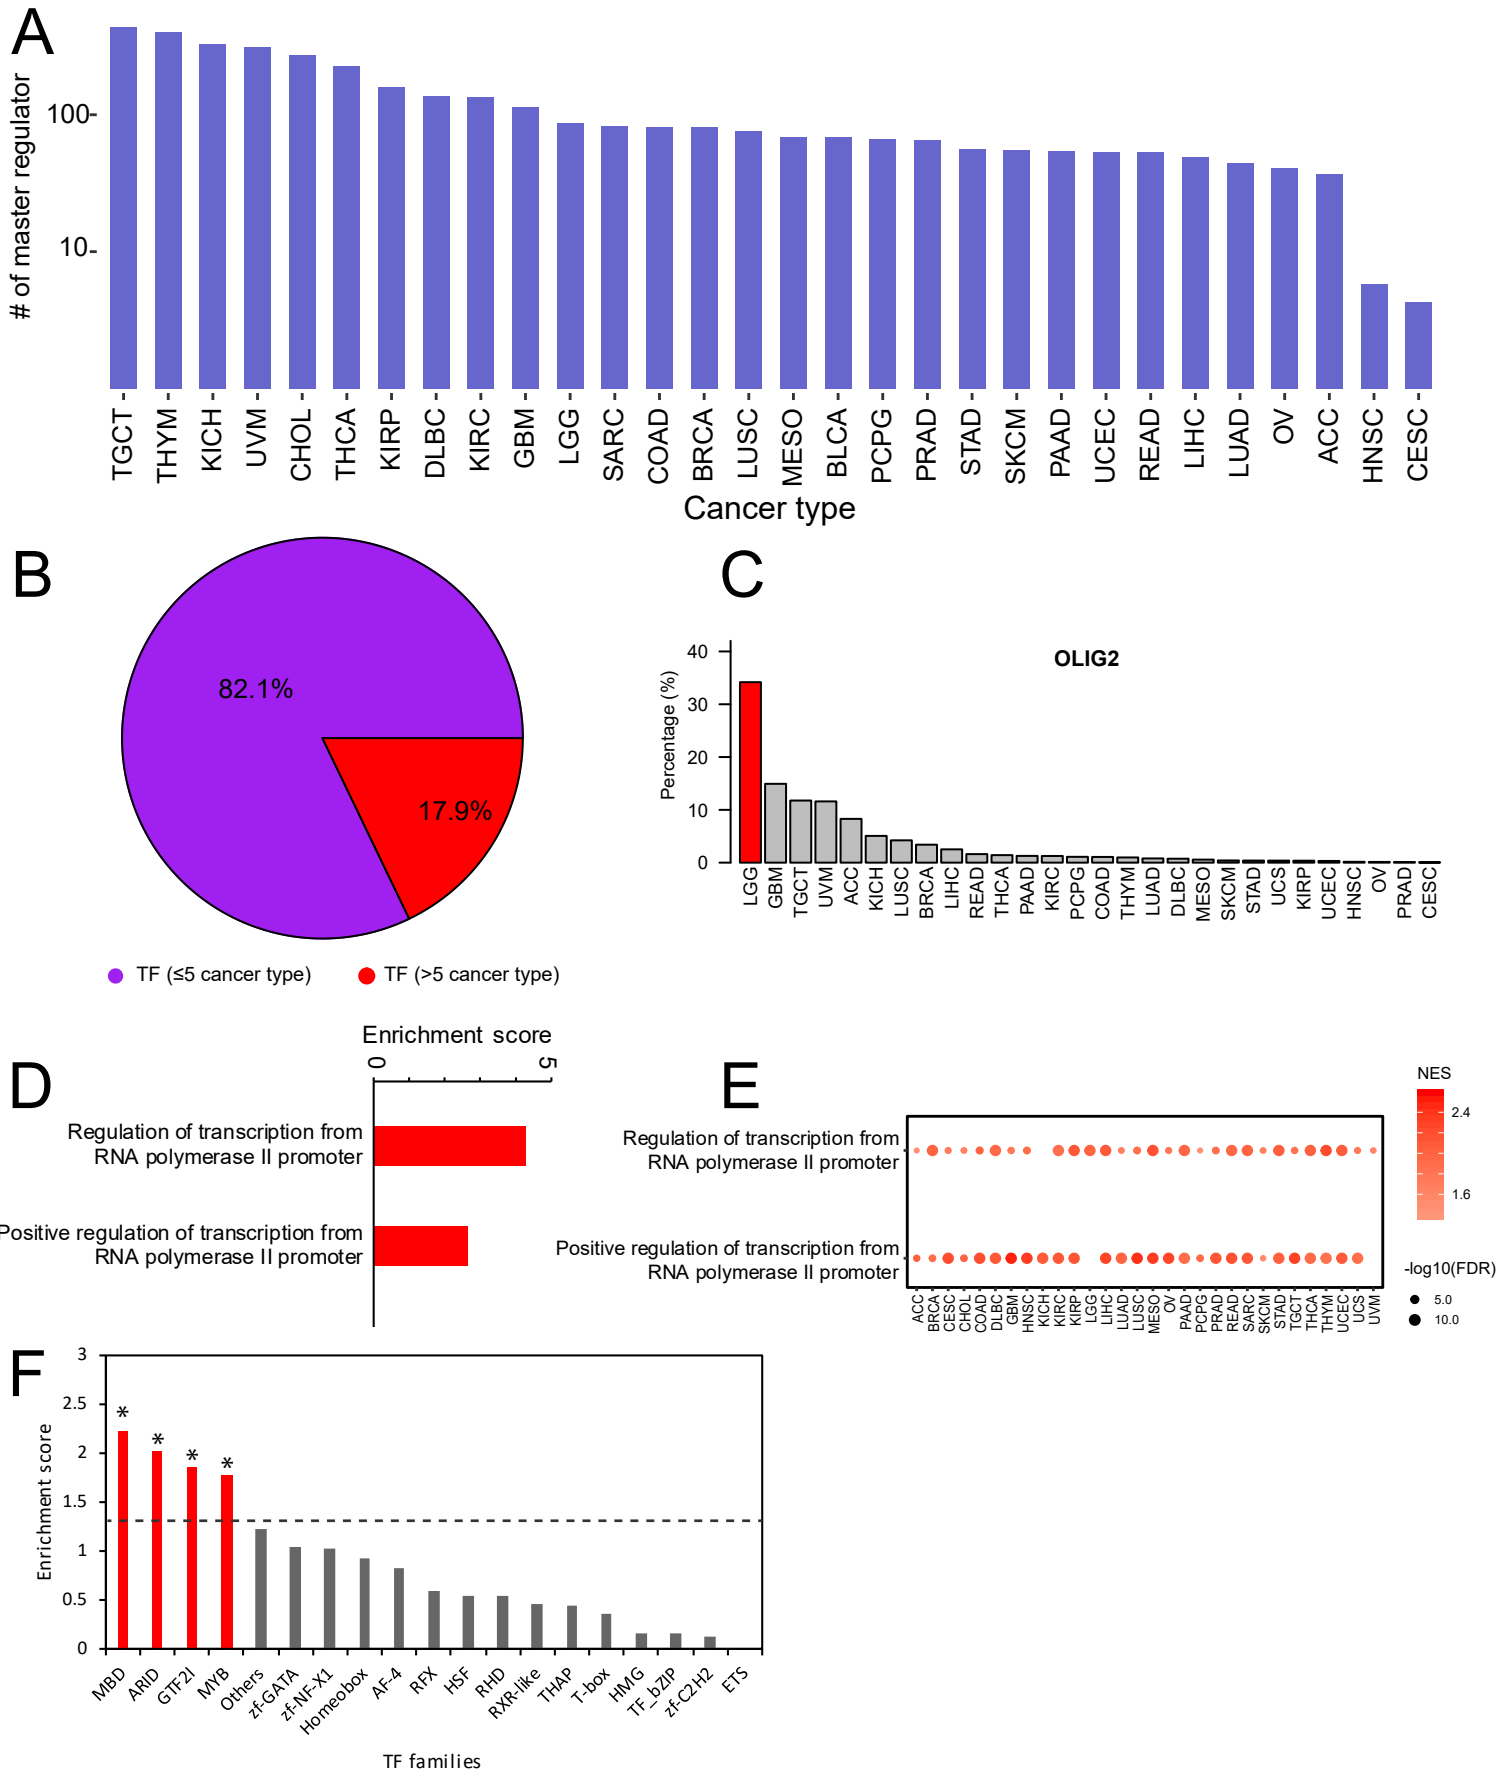

**Supplementary Figure 2. Master regulators of eRNAs across human cancers.**

(A) Number of putative master regulators of eRNAs across cancer types. (B) Overall cancer-type-specific feature for putative master regulators of eRNAs. (C) Percentage of eRNAs correlated to *OLIG2* across human cancers. (D) GO analysis for general putative master regulator analyzed by DAVID. (E) GO analysis for general master regulator analyzed by GSEA. Scale bar denotes normalized enrichment score (NES). (F) Enrichment analysis for general master regulators in 17 families.

# Supplementary Figure 3

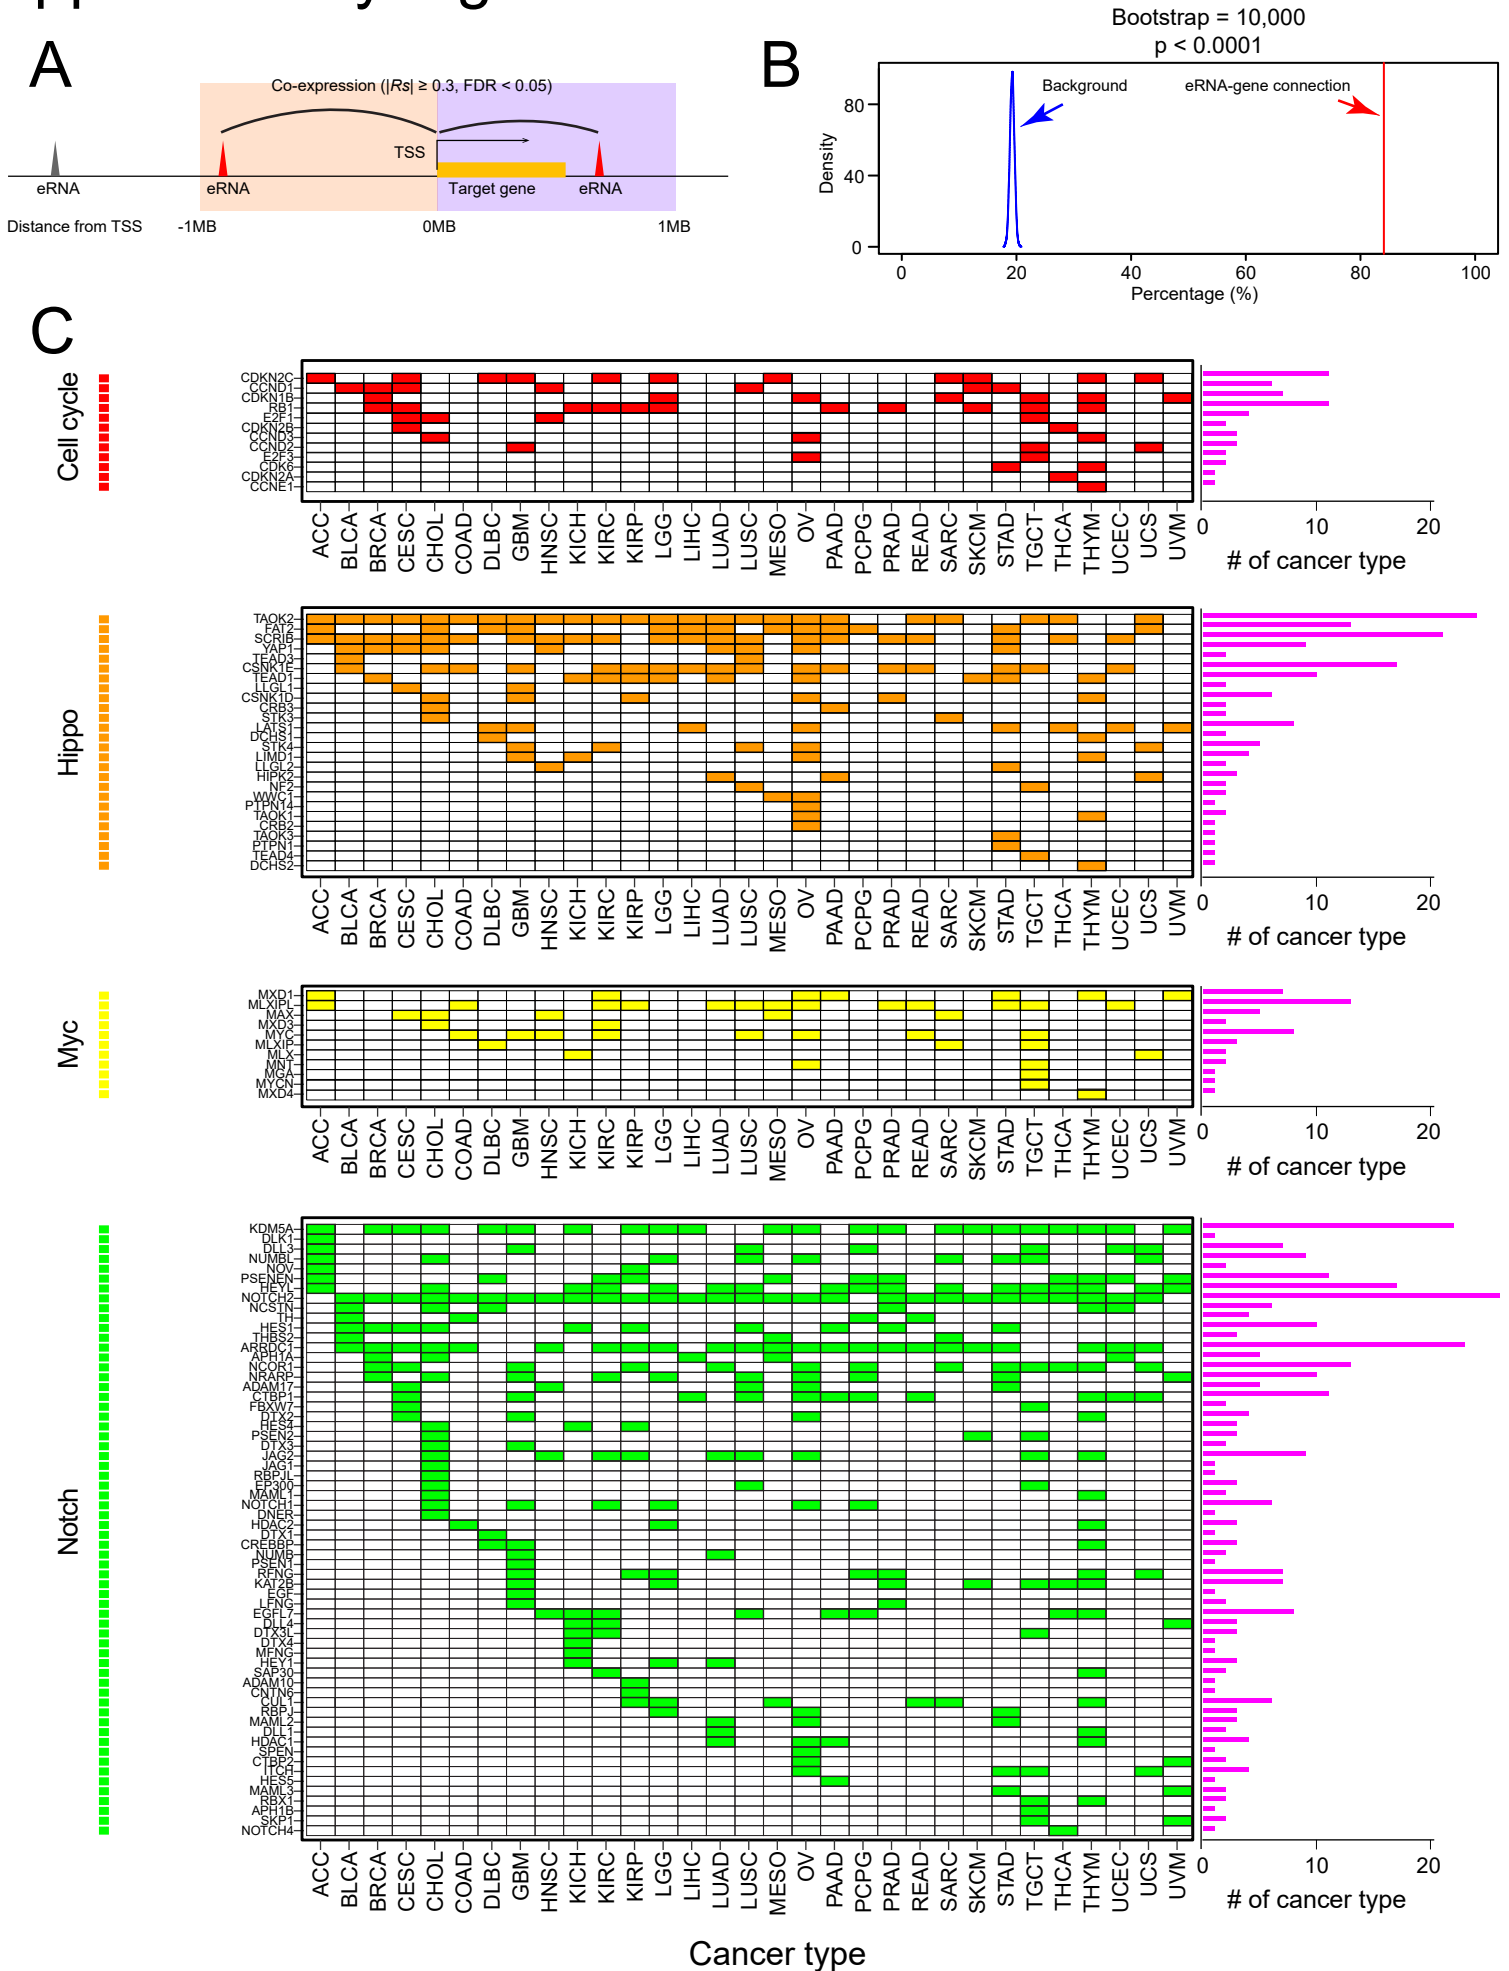

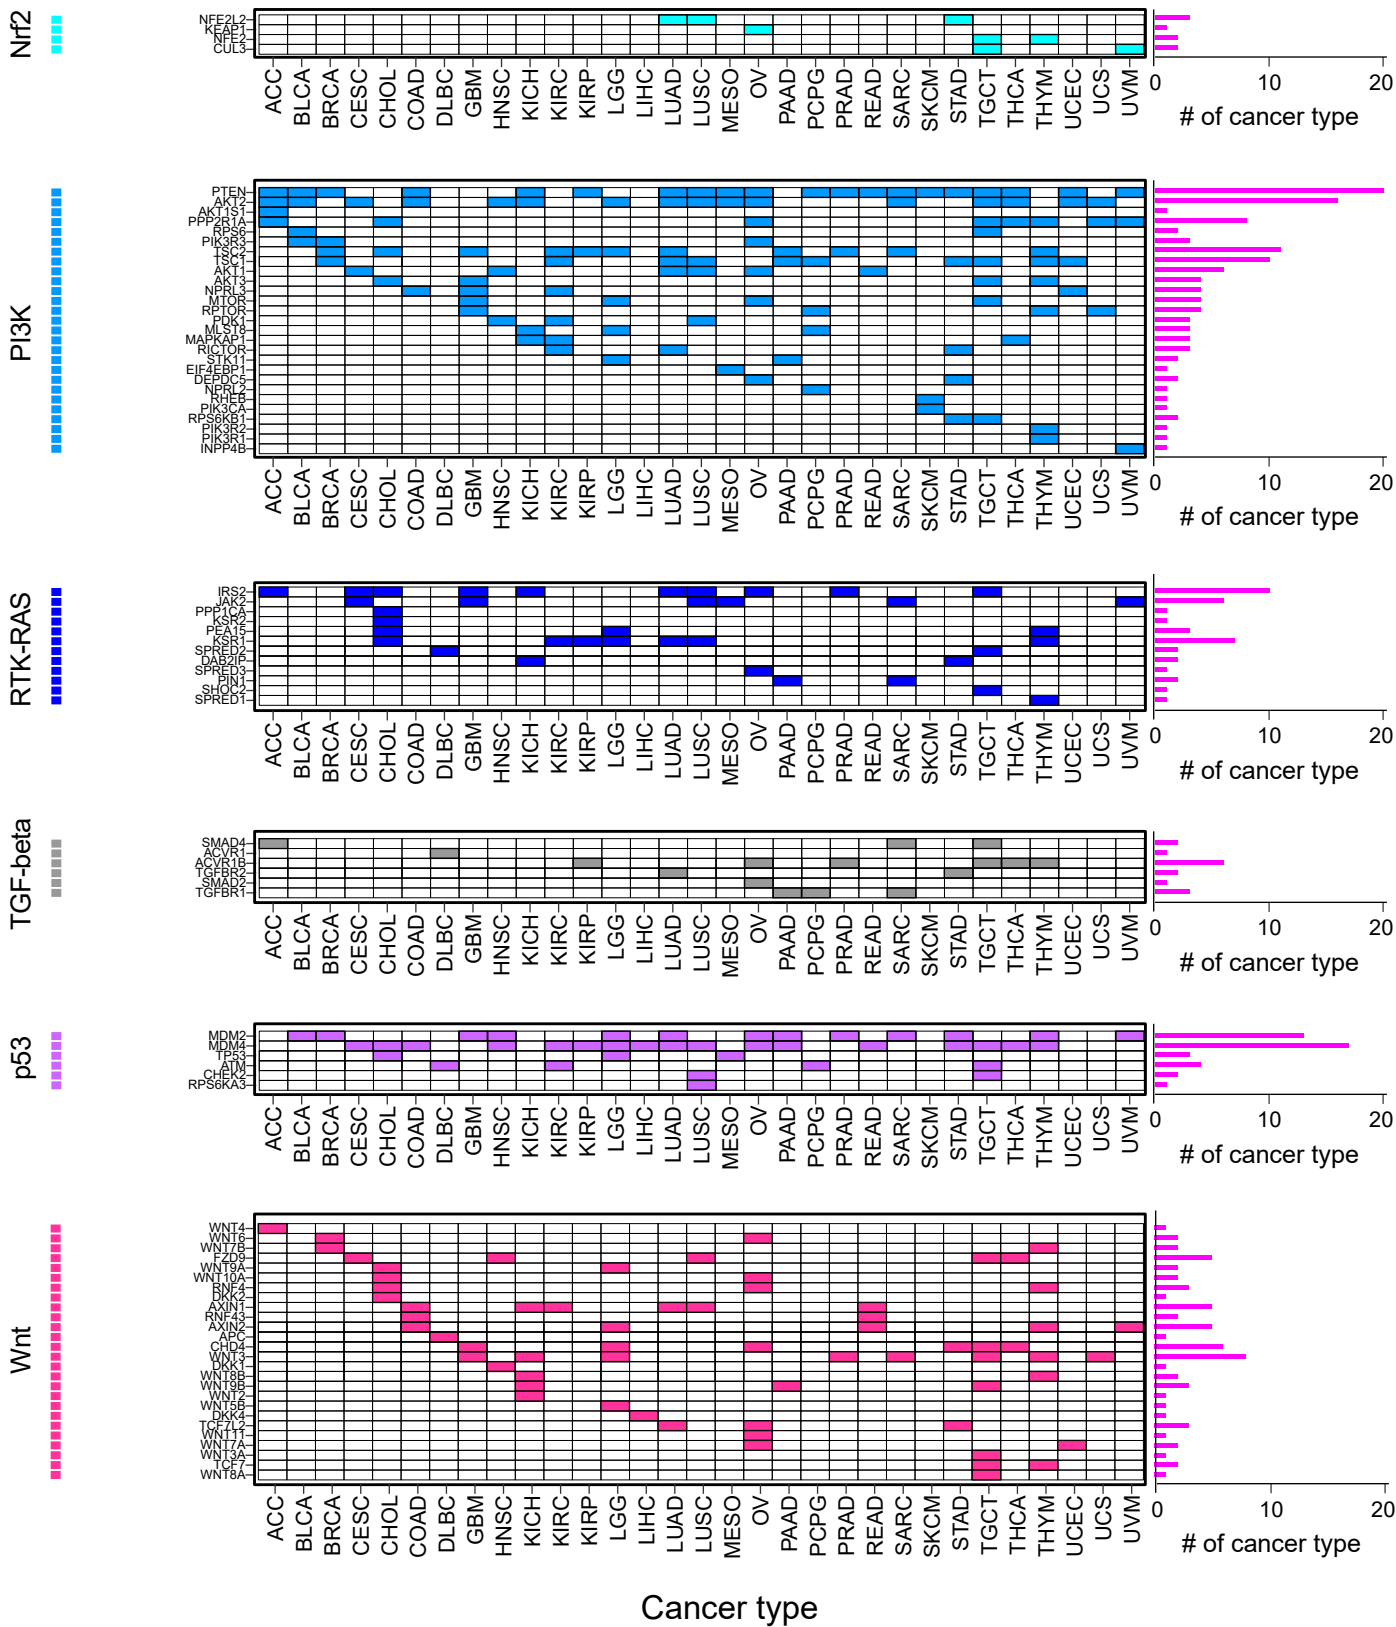

Cancer type



F

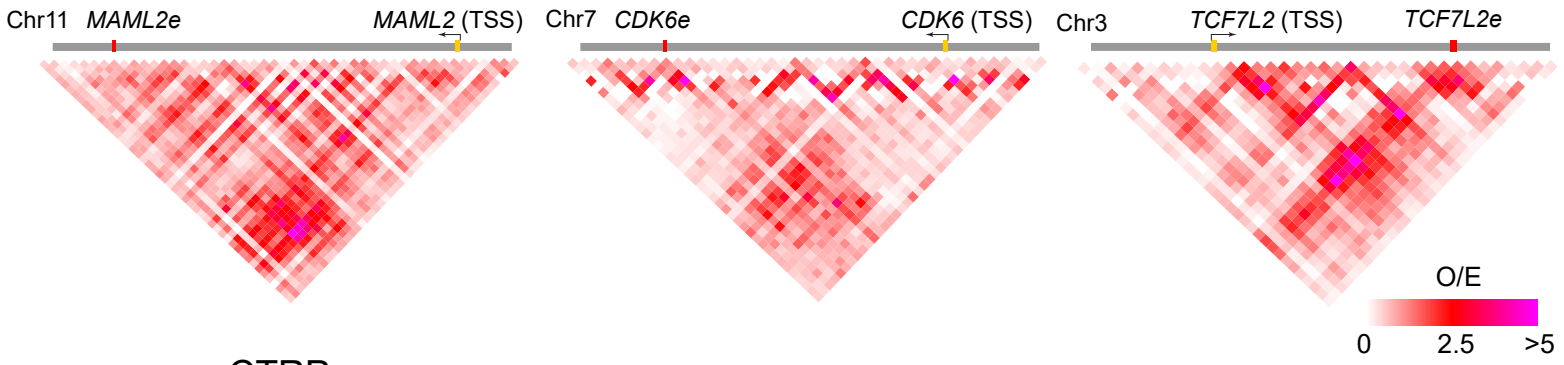

G

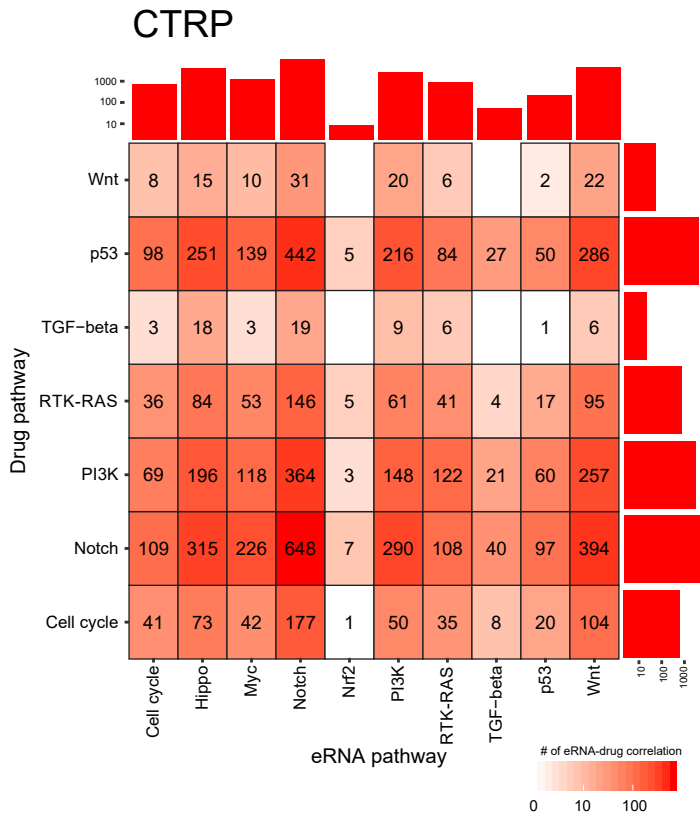

H

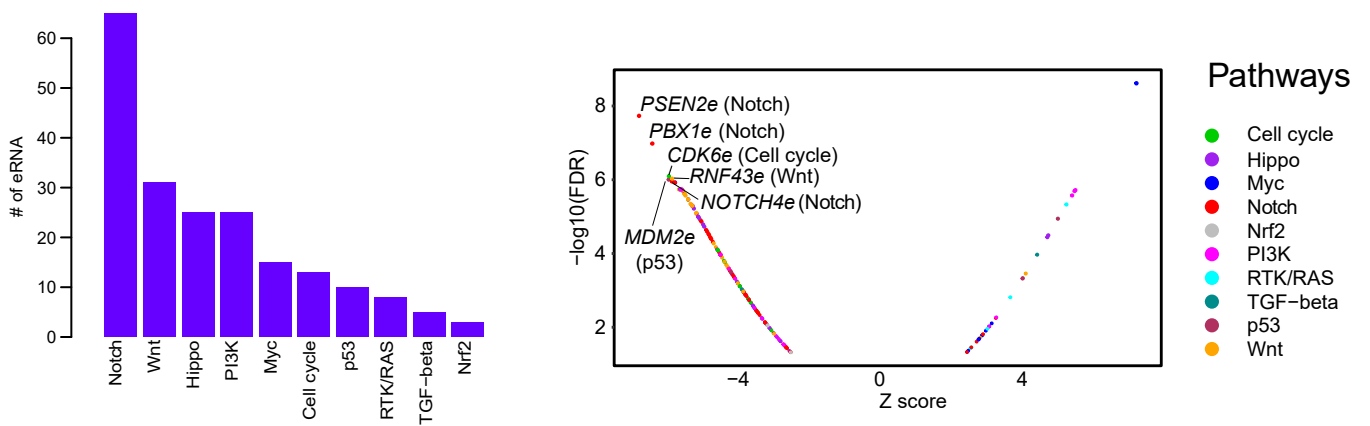

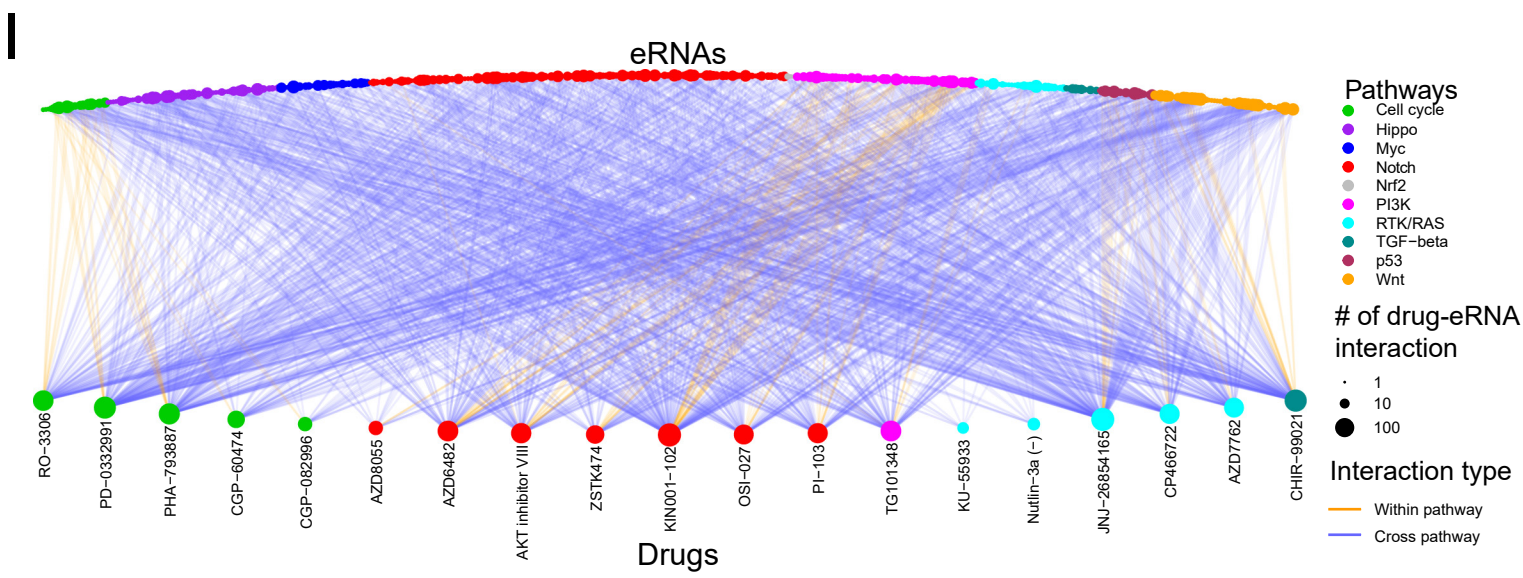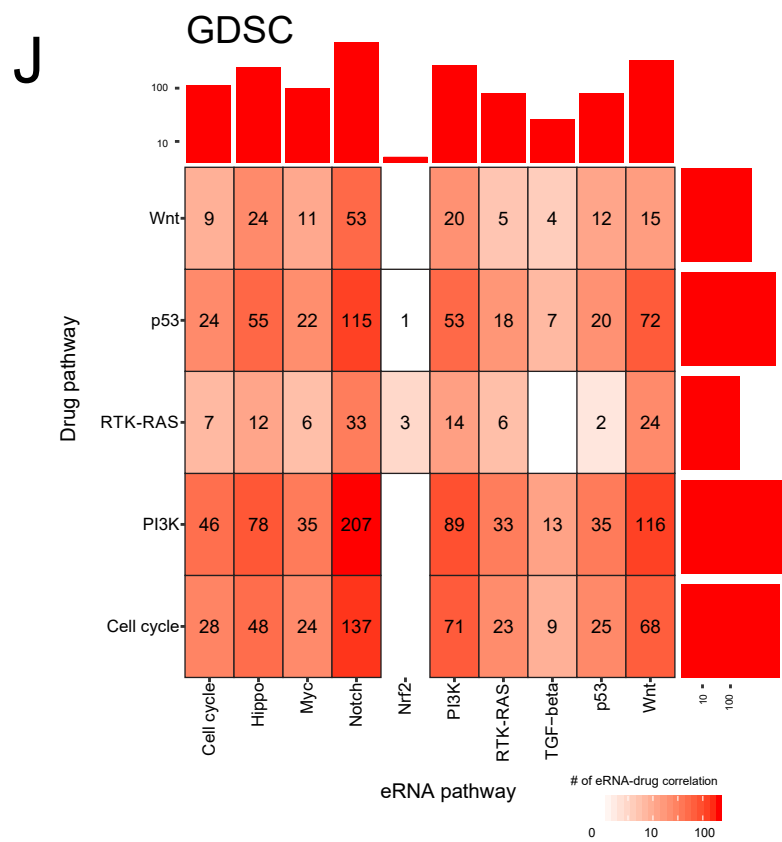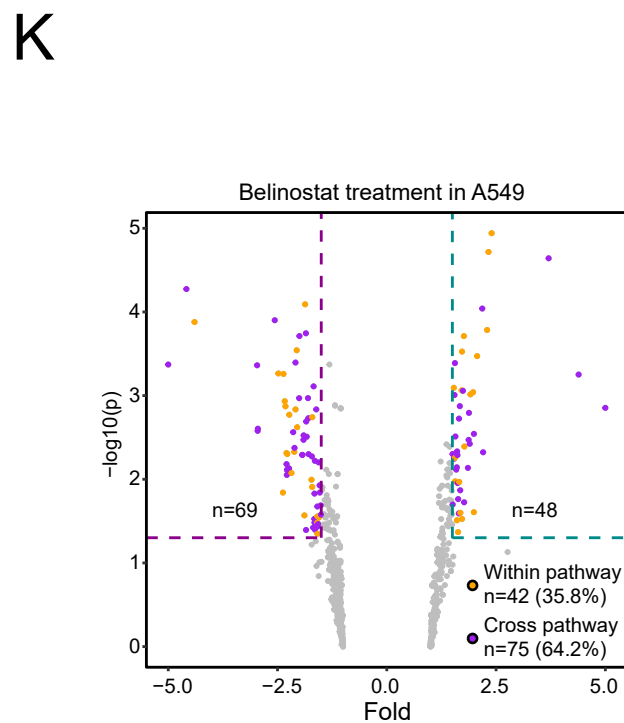

**Supplementary Figure 3. eRNA putative target genes and drug-associated eRNAs.**

(A) Definition for eRNA putative target genes. (B) Permutation test of Hi-C interactions between eRNA-gene correlated pairs and genome background of random eRNA-gene pairs across 20 human tissues. (C) Landscape of eRNA putative target genes in 10 cancer signaling pathways across human cancers. (D) Percentage of Hi-C interaction between eRNAs and putative target genes in 10 cancer signaling pathways. X-scale denotes pathways and y-scale denotes percentage of eRNA-gene association has Hi-C interaction. (E) Hi-C interaction between eRNAs and putative target genes for each cancer signaling pathway. Pie charts represent the number of dataset with interaction ( $O/E > 1$ ) in Hi-C data, while the y-scale (0, 10 and 20) means number of datasets showed interaction ( $O/E > 1$ ) in Hi-C data. (F) Example for Hi-C interaction between cancer signaling genes *MAML2* (Notch), *CDK6* (Cell cycle), *TCF7L2* (Wnt) and their eRNAs in adrenal, lung, and liver, respectively. Scale bar denotes Hi-C  $O/E$  value. (G) Statistical analyses for drug-eRNA association across cancer signaling pathways in CTRP database. Scale bar denotes number of eRNA-drug correlation. (H) Distribution of belinostat correlated eRNAs in cancer signaling pathways. (I) Associations between drugs and eRNAs across cancer signaling pathways in GDSC. (J) Statistical analyses for drug-eRNA association across cancer signaling pathways in GDSC database. Scale bar denotes number of eRNA-drug correlation. (K) Alterations of eRNAs under belinostat treatment in A549 cells.



# Supplementary Figure 4

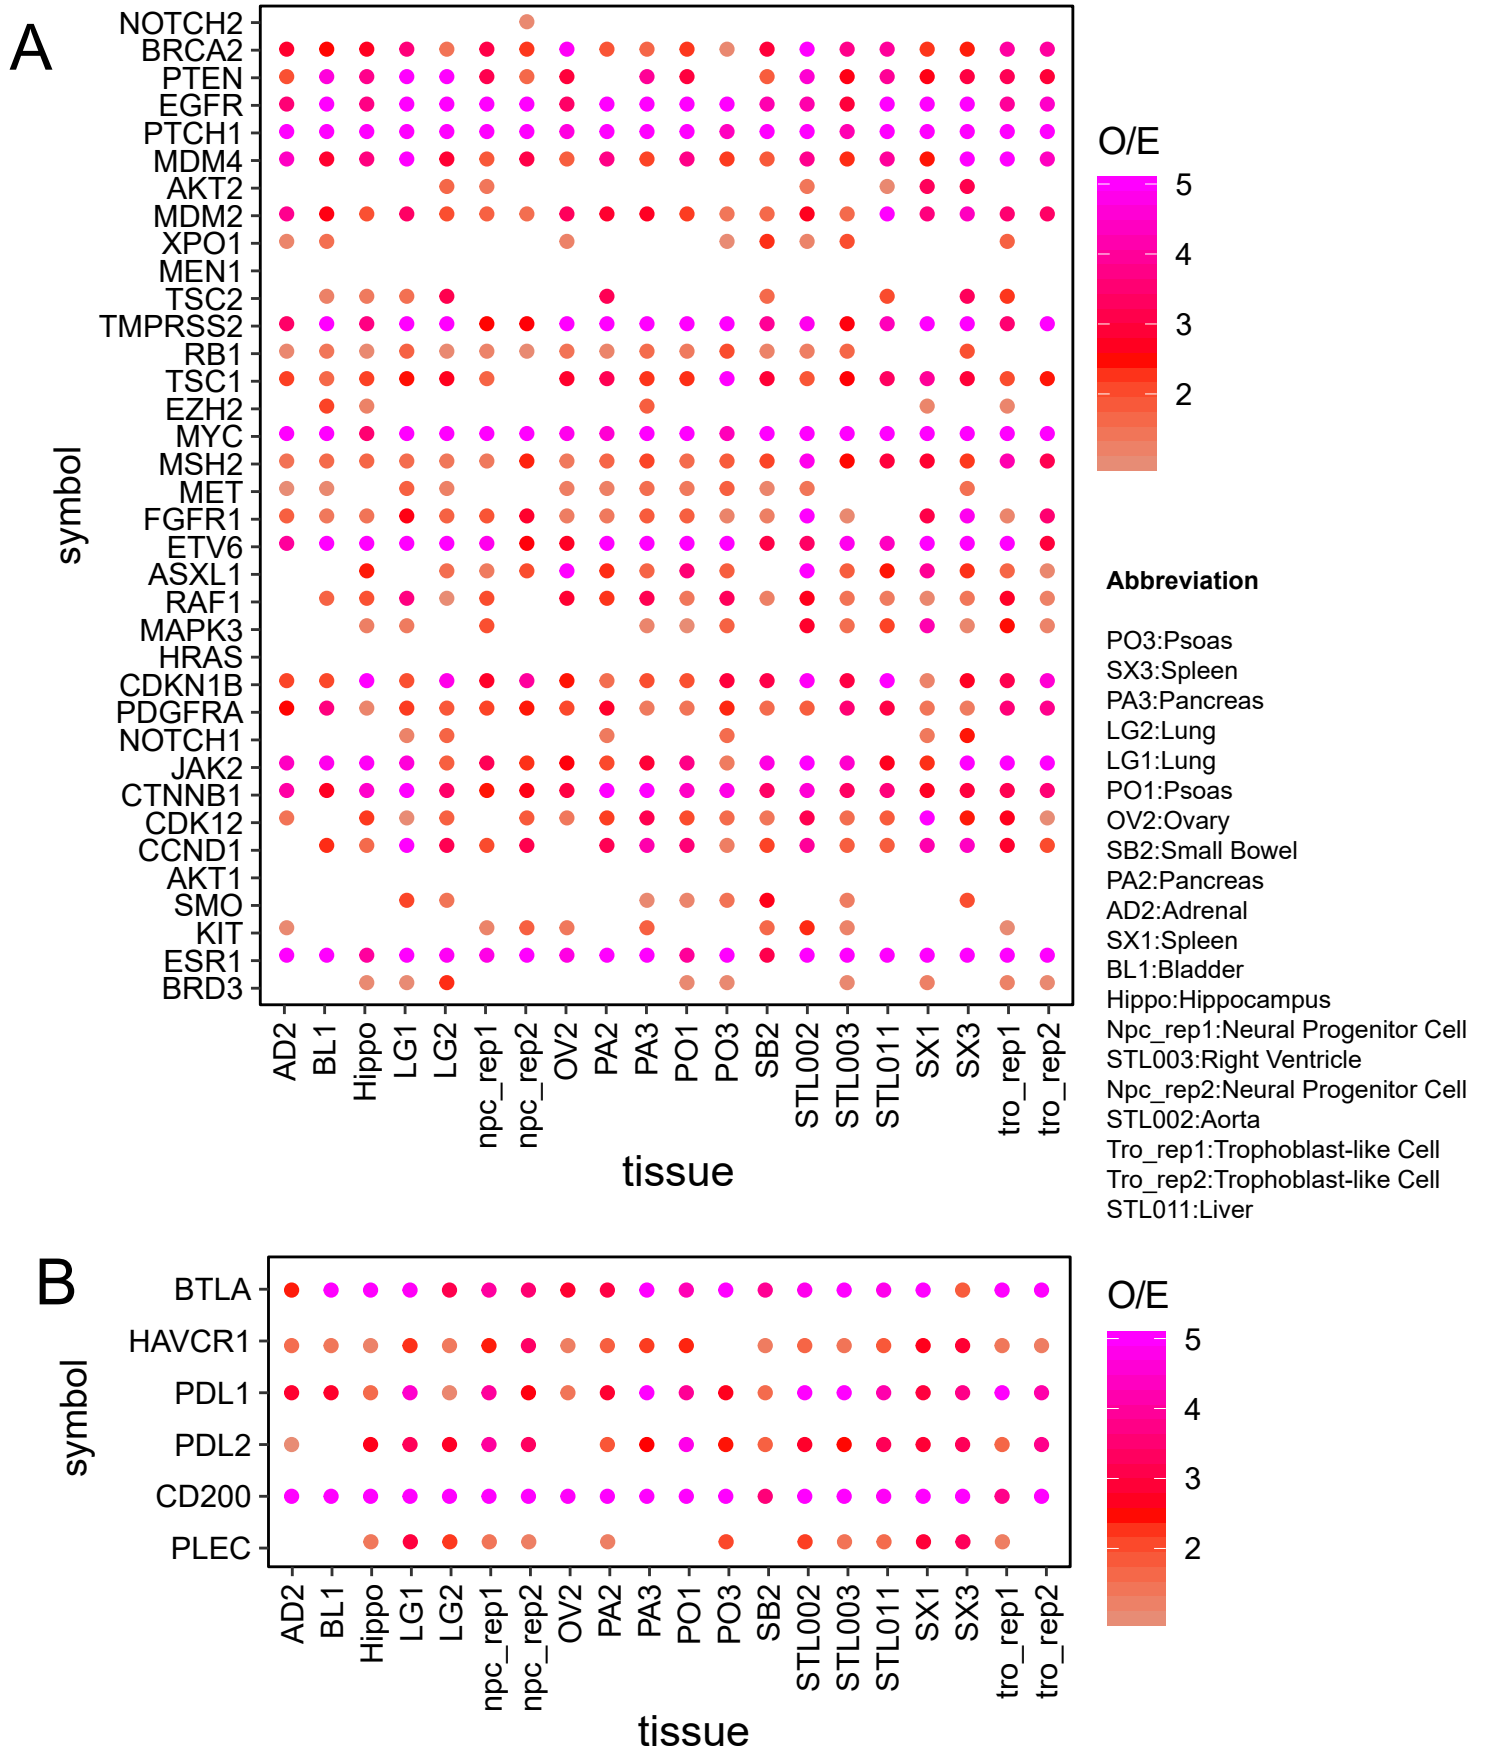

**Supplementary Figure 4. Hi-C interaction between eRNAs and clinically actionable genes and immune checkpoints across tissues.**  
 (A) Hi-C interaction between clinically actionable genes and eRNAs. (B) Hi-C interaction between immune checkpoints and eRNAs. Scale bars denote Hi-C O/E value.

# Supplementary Figure 5

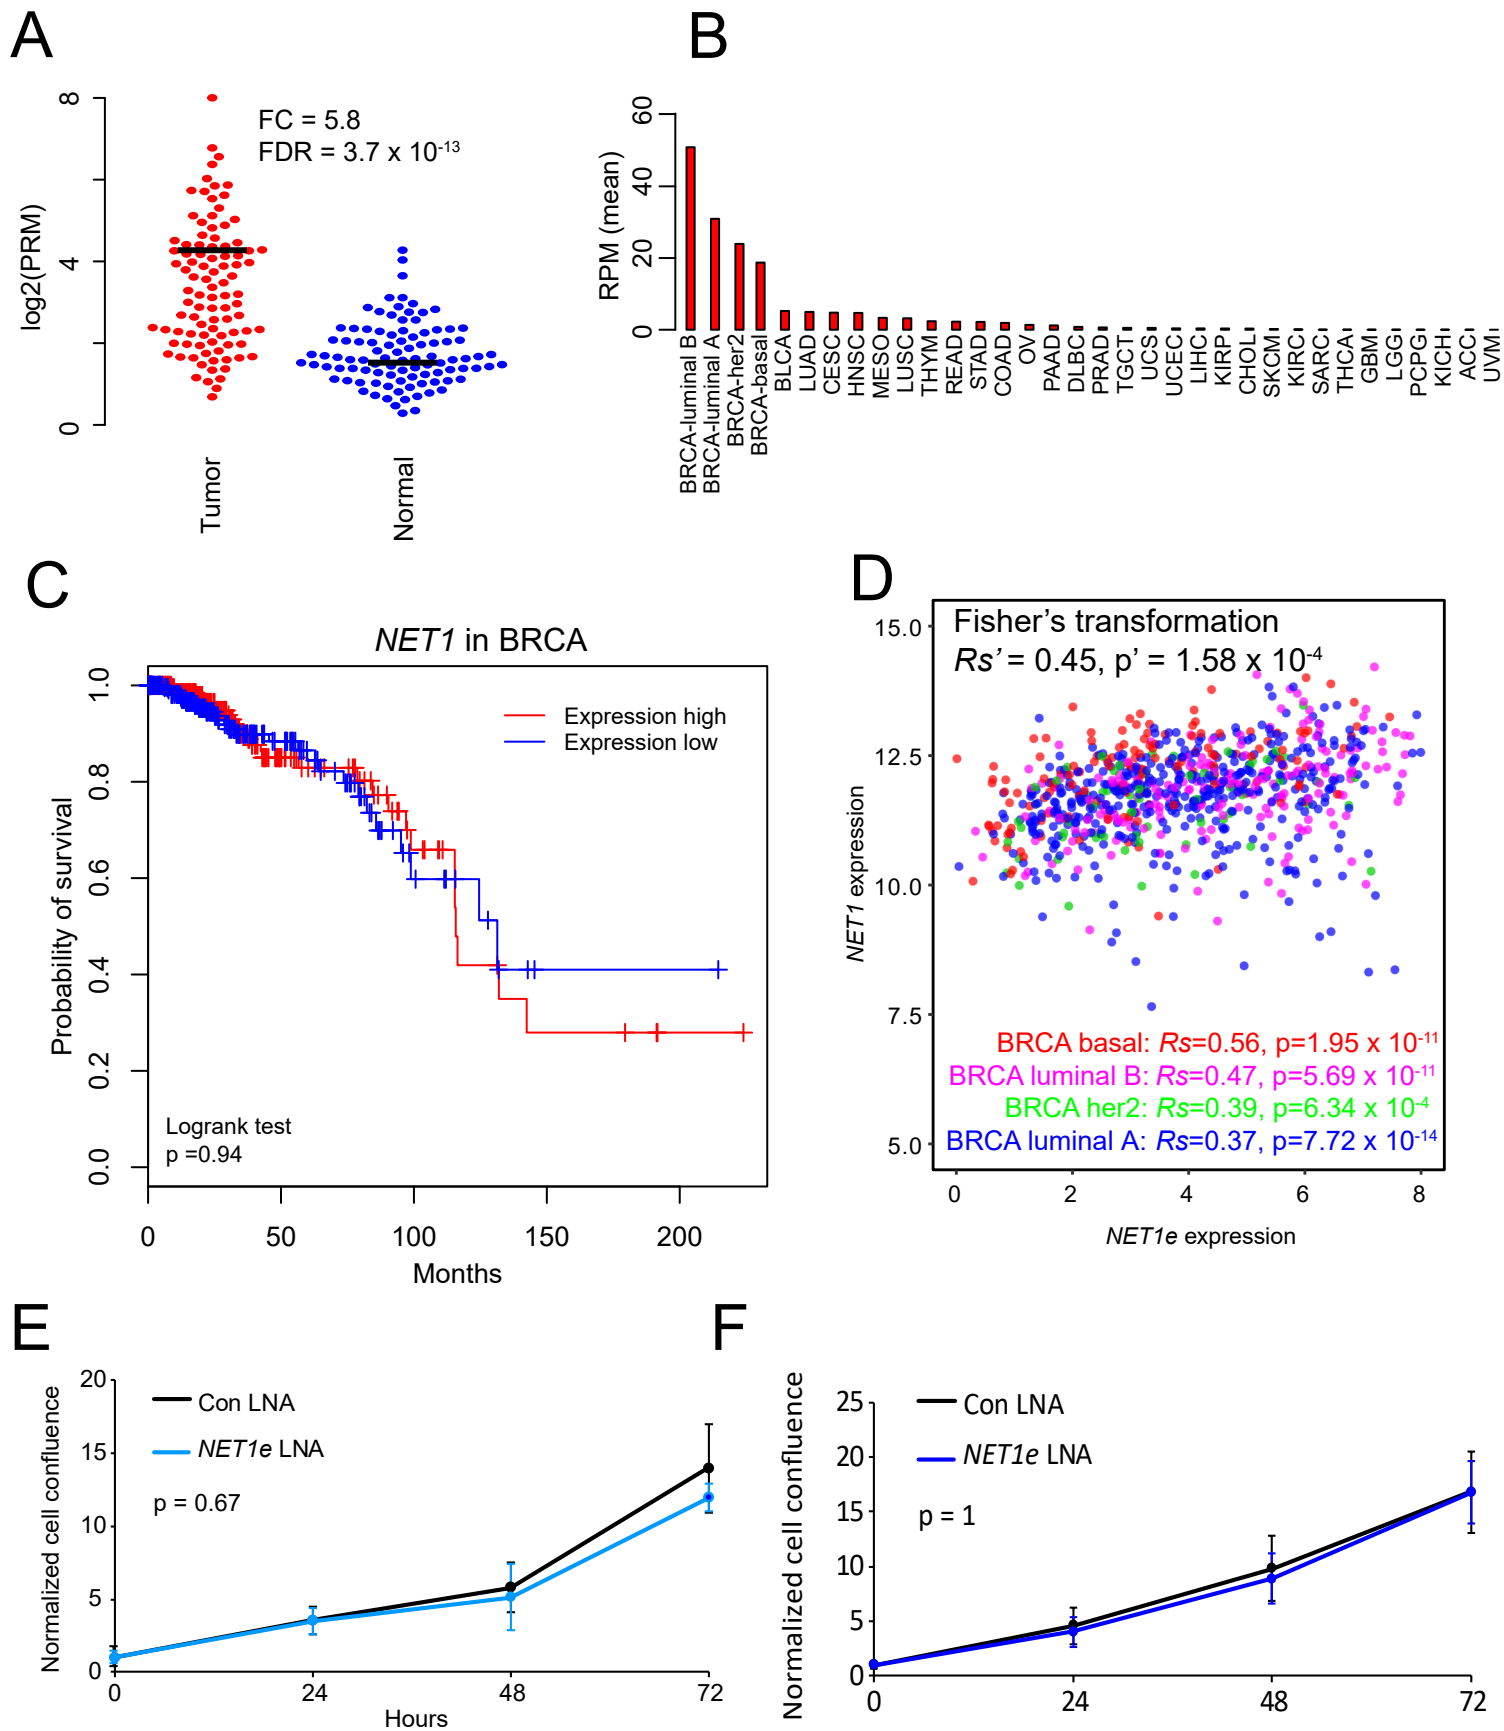

**Supplementary Figure 5. Features and functional characterization of *NET1e*.**

(A) Expression alteration of *NET1e* in paired BRCA samples (n = 99). (B) Expression of *NET1e* in human cancers, sample sizes for BRCA subtypes are Luminal B = 215, Luminal A = 486, HER2 = 77, and basal = 161. (C) Survival curves for *NET1* in BRCA. (D) Spearman's correlation between *NET1e* and *NET1* in each BRCA subtype. (E) Cell growth assay by knockdown *NET1e* in MCF10A cells. (F) Cell growth assay by knockdown *NET1e* in HeLa cells. Error bars in E and F indicate mean ± SD.

# Supplementary Figure 6

## A

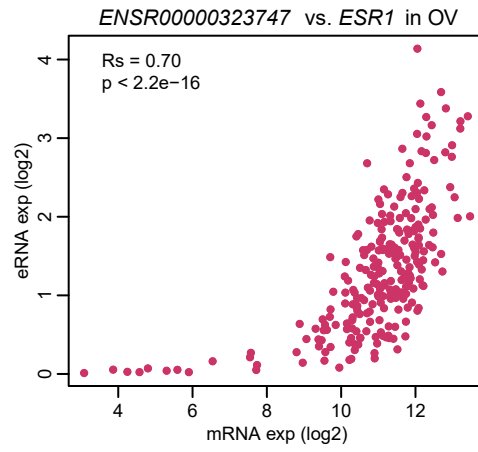

## B

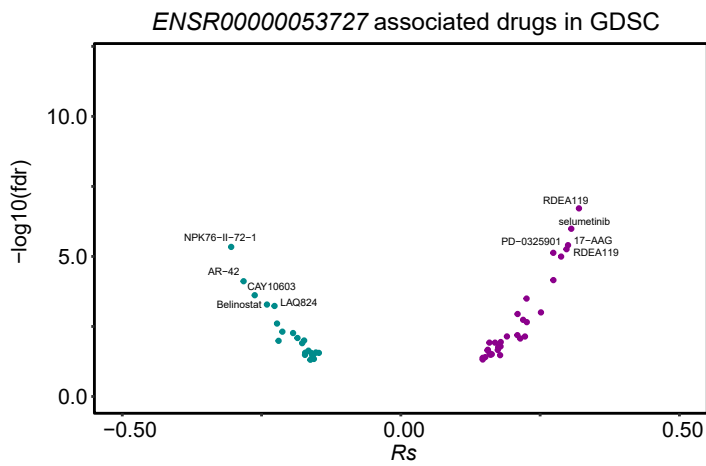

## C

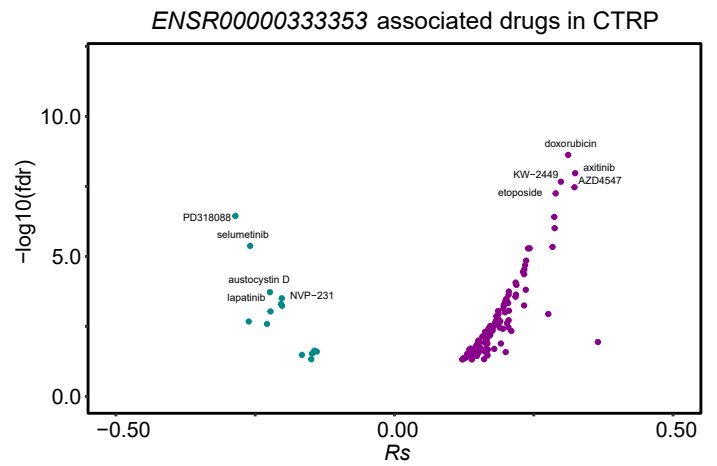

### Supplementary Figure 6. Overview of eRic.

(A) Associations between eRNAs and putative target genes. (B-C) Associations between eRNAs and drugs in CTRP (B) and GDSC (C).

# Supplementary Figure 7

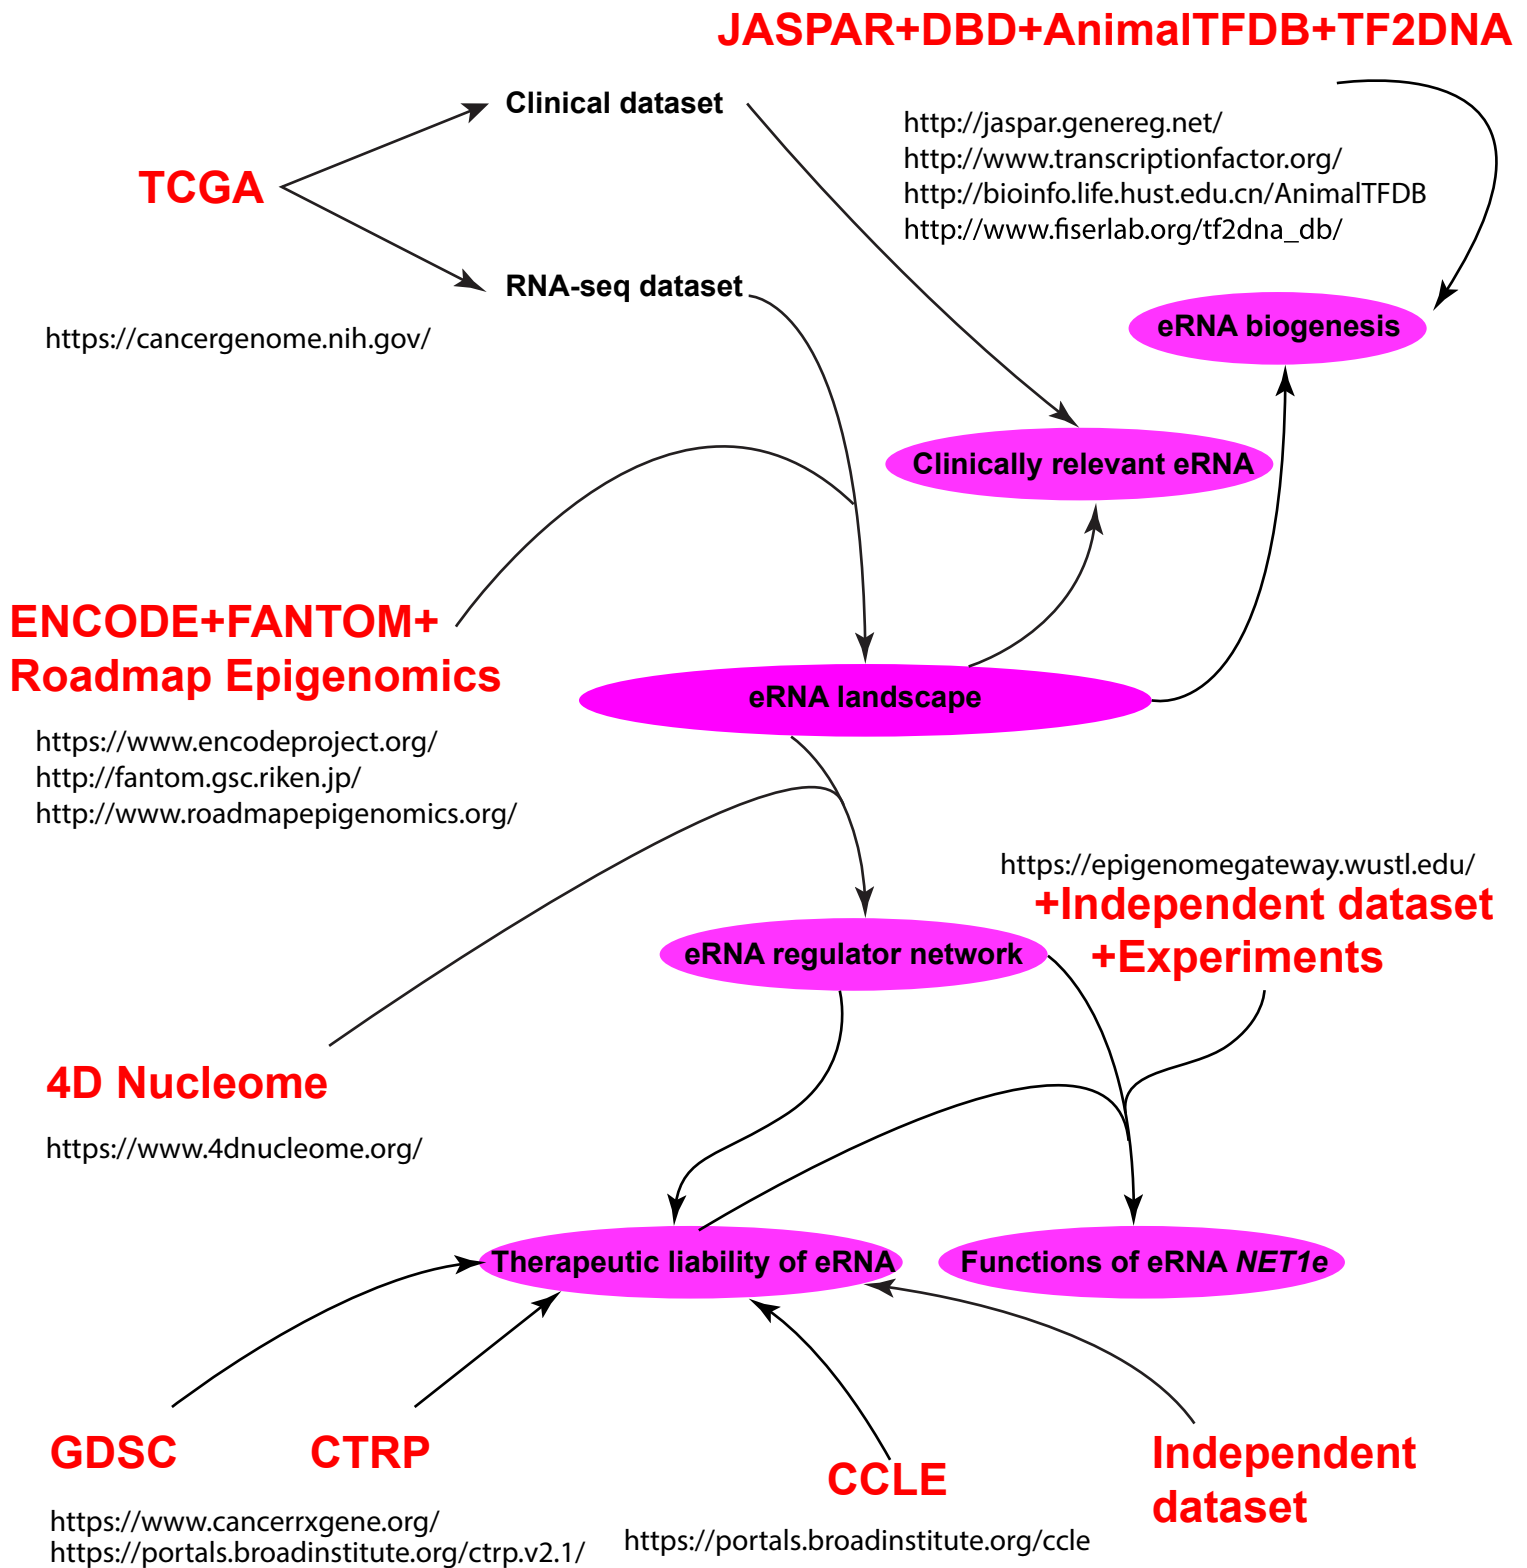

Supplementary Figure 7. Multi-omics data and pharmacogenomics data used in this study.

# Supplementary Tables

**Supplementary Table 1.** List of multi-omics data and pharmacogenomics data used in this study.

| <b>Dataset</b>          | <b>Description</b> | <b>Link</b>                                                                                                       |
|-------------------------|--------------------|-------------------------------------------------------------------------------------------------------------------|
| TCGA RNA-seq            | Genomic Data       | <a href="https://portal.gdc.cancer.gov/">https://portal.gdc.cancer.gov/</a>                                       |
| TCGA clinical dataset   | Clinical data      | <a href="https://portal.gdc.cancer.gov/">https://portal.gdc.cancer.gov/</a>                                       |
| Ensembl Regulator Build | Genomic annotation | <a href="https://useast.ensembl.org/index.html">https://useast.ensembl.org/index.html</a>                         |
| Fantom enhancer         | Genomic annotation | <a href="http://fantom.gsc.riken.jp/index.html">http://fantom.gsc.riken.jp/index.html</a>                         |
| Roadmap Epigenomics     | Genomic annotation | <a href="http://www.roadmapepigenomics.org/">http://www.roadmapepigenomics.org/</a>                               |
| Jaspar                  | TF gene list       | <a href="http://jaspar.genereg.net/">http://jaspar.genereg.net/</a>                                               |
| TF2dna                  | TF gene list       | <a href="http://www.fiserlab.org/tf2dna_db/">http://www.fiserlab.org/tf2dna_db/</a>                               |
| AnimalTFDB              | TF gene list       | <a href="http://bioinfo.life.hust.edu.cn/AnimalTFDB/">http://bioinfo.life.hust.edu.cn/AnimalTFDB/</a>             |
| DBD                     | TF gene list       | <a href="http://www.transcriptionfactor.org/index.cgi/Home">http://www.transcriptionfactor.org/index.cgi/Home</a> |
| CCLE RNA-seq            | Genomic Data       | <a href="https://portals.broadinstitute.org/ccle">https://portals.broadinstitute.org/ccle</a>                     |
| CTRP drug response      | Drug response data | <a href="https://portals.broadinstitute.org/ctrp/">https://portals.broadinstitute.org/ctrp/</a>                   |
| GDSC drug response      | Drug response data | <a href="https://www.cancerrxgene.org/">https://www.cancerrxgene.org/</a>                                         |
| Human Hi-C interaction  | Genomic Data       | <a href="http://promoter.bx.psu.edu/public/HiCPlus/matrix/">http://promoter.bx.psu.edu/public/HiCPlus/matrix/</a> |
| MCF7 Gro-seq            | Genomic Data       | <a href="https://epigenomegateway.wustl.edu/">https://epigenomegateway.wustl.edu/</a>                             |
| MCF7 ChIP-seq           | Genomic Data       | <a href="https://epigenomegateway.wustl.edu/">https://epigenomegateway.wustl.edu/</a>                             |

**Supplementary Table 2.** CRISPR gRNA, LNA, and PCR primers used in this study.

| <b>Name</b>     | <b>Sequences</b>          |
|-----------------|---------------------------|
| Control LNA     | TTACAGAAGGAGTCGT          |
| NET1e LNA#1     | TTGAAGCTGGTGGAGC          |
| NET1e LNA#2     | GAAGAACCTCTTGAA           |
| NET1e LNA#3     | Qiagen LG00000002         |
| NET1e gRNA1-Fwd | CACCGGAGGAATGTGCAAACGGCCC |
| NET1e gRNA1-Rev | AAACGGGCCGTTTGCACATTCCTCC |
| NET1e gRNA2-Fwd | CACCGAGCCTACACCCTGGAGGTAC |
| NET1e gRNA2-Rev | AAACGTACCTCCAGGGTGTAGGCTC |
| NET1e-Fwd       | CAGGCCTACCAGGATGGATA      |
| NET1e-Rev       | AGTTGACTTGGGTGGGACAG      |
| NET1-Fwd        | ACCTGGATGAAAAGCAGAGG      |
| NET1-Rev        | GGTAAGAGTGCCGTTTCGTTT     |
| GAPDH-Fwd       | GTTTTTCTAGACGGCAGGTCA     |
| GAPDH-Rev       | AACATCATCCCTGCCTCTACT     |
