# Supplementary material for: Transcriptional landscape and clinical utility of enhancer RNAs for eRNA-targeted therapy in cancer
Source: PubMed Central journal article supplement (PMC6783481; doi:10.1038/s41467-019-12543-5), 2019-10-08
Supplement: 41467_2019_12543_MOESM2_ESM.pdf [file 41467_2019_12543_MOESM2_ESM.pdf]

## **Description of Additional Supplementary Data**

**Supplementary Data 1.** Number of samples, detectable eRNAs, and detail for abbreviation of each cancer type.

**Supplementary Data 2.** Putative master regulators for eRNAs in each cancer type.

**Supplementary Data 3.** Spearman's correlation between eRNAs and target genes in cancers.

**Supplementary Data 4.** Spearman's correlation and Hi-C interactions between eRNAs and clinically actionable genes.

**Supplementary Data 5.** Spearman's correlation and Hi-C interactions between eRNAs and immune checkpoints.

**Supplementary Data 6.** Expression alterations of eRNAs across cancer types.

**Supplementary Data 7.** List of drugs correlated to *NET1e* from CTRP database and GDSC database.

**Supplementary Data 8.** Clinically relevant eRNAs across cancer types.
